# Supplementary material for: One-dimensional lead-free perovskite single crystals with high X-ray response grown by liquid phase diffusion
Source: Royal Society of Chemistry journal article supplement (doi:10.1039/d2tc04481a), 2022-11-30
Supplement: d2tc04481a1.pdf [file d2tc04481a1.pdf]

# One-dimensional lead-free perovskite single crystal with high X-ray response grown by liquid phase diffusion

Chang-Feng Wang,<sup>†</sup> Cui-Ling Fang,<sup>†</sup> Yan Feng, Shi-Yu Liu, Yi Zhang, Heng-Yun Ye, Le-Ping Miao and Lang Liu\*

## 1. Experimental section

### 1.1 Synthesis methods

#### 1.1.1 Temperature cooling method

A mixture of 1,5-pentanediamine iodide (2 mmol, 0.712 g) and BiI<sub>3</sub> (2 mmol, 1.18 g) in aqueous HI solution (55.0% - 58.0%, about 30 mL) was heated and stirred at 405 K until a clear solution was formed. The solution was allowed to cool at a rate of 2 K h<sup>-1</sup>, which yielded black crystals.

#### 1.1.2 Liquid phase diffusion method

First, an H-shaped test tube was placed somewhere undisturbed. 1,5-pentanediamine iodide (5 mmol, 1.78 g) and BiI<sub>3</sub> (5 mmol, 2.95 g) were dissolved in aqueous HI solution (55.0% - 58.0%, about 25 mL), respectively. These solutions were completely stirred at room temperature for 3 h and then filtered to obtain transparent precursor solutions. Then, 1,5-pentanediamine iodide and BiI<sub>3</sub> precursor solutions were transferred into test tubes A and C, respectively, as shown in Figure 2a. Finally, aqueous HI solution (55.0% - 58.0%, about 20 mL) was carefully added to the test tube in drops along the wall. Glass stoppers seal the orifice to prevent the HI from oxidizing. After a month, black crystals were obtained in test tube B.

## 1.2 Determination of single crystal structure

Single dull dark black plank-shaped crystals of (1,5-PDA)BiI<sub>5</sub> were used as supplied. A suitable crystal with dimensions 0.35 × 0.22 × 0.21 mm<sup>3</sup> was selected and mounted on a XtaLAB Synergy R, HyPix diffractometer. The crystal was kept at a steady  $T = 302$  K during data collection. The structure was solved with the ShelXT 2014/5 (Sheldrick, 2014) solution program using iterative methods and by using Olex2 1.5-alpha (Dolomanov et al., 2009) as the graphical interface.<sup>[1-2]</sup> The model was refined with ShelXL 2018/1 (Sheldrick, 2015) using full matrix least squares minimization on  $F^2$ .<sup>[3]</sup>

The X-ray crystallographic structures have been deposited at the Cambridge Crystallographic Data Centre (deposition numbers 2207566), and can be obtained free of charge from the CCDC via [www.ccdc.cam.ac.uk/get\\_structures](http://www.ccdc.cam.ac.uk/get_structures).

References:

1. O.V. Dolomanov and L.J. Bourhis and R.J. Gildea and J.A.K. Howard and H. Puschmann, Olex2: A complete structure solution, refinement and analysis program, *J. Appl. Cryst.*, (2009), **42**, 339-341.
2. Sheldrick, G.M., ShelXT-Integrated space-group and crystal-structure determination, *Acta Cryst.*, (2015), **A71**, 3-8.
3. Sheldrick, G.M., Crystal structure refinement with ShelXL, *Acta Cryst.*, (2015), **C71**, 3-8.

## 1.3 Evaluation of distortion of octahedra

The calculation of  $\Delta d$ .

$$\Delta d = \left(\frac{1}{6}\right) \sum (d_i - d_0)^2 / d_0^2 = 0.03909$$

Where  $\Delta d$  is distortion index;  $d_i$  is Bi-I bond length;  $d_0$  is the average Bi-I bond length.

The calculation of  $\sigma^2$ .

$$\sigma^2 = \sum_{i=1}^{12} \frac{(\theta_i - 90)^2}{11} = 18.55$$

Where  $\sigma^2$  is bond angle variance;  $\theta_i$  is I-Bi-I bond angle.

## 1.4 Hirshfeld surfaces analysis

Hirshfeld surfaces and two-dimensional (2D) fingerprint plots were calculated by the CrystalExplorer software.<sup>[1]</sup> CIF format of (1,5-PDA)BiI<sub>5</sub> in room temperature was adopted for providing structural information. The calculation resolution is high (standard). Normalized contact distance ( $d_{norm}$ ) is defined by equation 1, in which,  $d_i/d_e$  represents a distance from a point on the surface to the nearest nucleus outside/inside the surface;  $r_i^{vdW}/r_e^{vdW}$  is the van der Waals (vdW) radius of the appropriate atom internal/external to the surface.

$$d_{norm} = \frac{d_i - r_i^{vdW}}{r_i^{vdW}} + \frac{d_e - r_e^{vdW}}{r_e^{vdW}} \quad (\text{equation 1})$$

The negative/positive  $d_{norm}$  suggests contact shorter/greater than vdW separations. When  $d_{norm}$  is mapped on Hirshfeld surface, a red-white-blue color scheme is adopting for displaying  $d_{norm}$ , where red highlights shorter contacts, white is used for contacts around the vdW separation, and blue is for longer contacts. 2D fingerprint plots are created by binning ( $d_i$ ,  $d_e$ ) pairs in intervals of 0.01 Å. Coloring each bin (essentially a pixel) of the resulting 2D histogram as a function of the fraction of surface points in that bin, ranging from blue (few points) through green to red (many points).

References:

[1] P. R. Spackman, M. J. Turner, J. J. McKinnon, S. K. Wolff, D. J. Grimwood, D. Jayatilaka, M. A. Spackman, *J. Appl. Crystallogr.* **2021**, *54*, 1006.

## 1.5 PXRD measurements

The Rigaku D/MAX 2000 x-ray diffractometer adopting Cu-K $\alpha$  radiation ( $\lambda = 0.15406$  nm, 40 kV and 40 mA) and a secondary beam graphite monochromator was used to perform PXRD measurement. Measurement angle ranges from 5° to 50° with step size of 0.02° and scanning speed 2° min<sup>-1</sup>.

## 1.6 Thermogravimetric measurements

Thermogravimetric (TG) measurements were recorded on a NETZSCH TG 209F3 apparatus under an N<sub>2</sub> atmosphere with a heating rate of 10 K min<sup>-1</sup>.

## 1.7 UV–vis diffuse reflectance spectroscopy measurements

Ultraviolet–visible (UV–vis) diffuse reflectance spectroscopy measurements were performed at 303 K using a Shimadzu (Tokyo, Japan) UV-2600 spectrophotometer with an ISR–2600 Plus integrating sphere operating from 200 to 800 nm. The powder crystals of (1,5-pentanediamine)BiI<sub>5</sub> were used for UV–vis absorption spectrum measurements. BaSO<sub>4</sub> was used as a 100% reflectance reference.

## 1.8 The fitting bandgap

The optical bandgap was determined from the fitting of the variant *Tauc* equation for direct bandgap:

$$((h\nu \cdot F(R_\infty))^2 = A(h\nu - E_g)$$

where  $h$  is Planck constant,  $\nu$  is the frequency of the photon,  $F(R_\infty)$  is the Kubelka–Munk function, and  $A$  is a proportional constant.

## 1.9 DFT calculation

First-principles DFT calculation was performed with single-crystal structure data of (1,5-PDA)BiI<sub>5</sub> by the Cambridge Sequential Total Energy Package (CASTEP). The exchange–correlation functional was described by a generalized gradient approximation (GGA) with Perdew–Burke–Ernzerhof (PBE) functional scheme. The interactions between the ionic cores and the electrons were described by the Ultrasoft pseudopotential. The following orbital electrons were treated as valence electrons: H, 1s<sup>1</sup>; C, 2s<sup>2</sup> 2p<sup>2</sup>; N, 2s<sup>2</sup> 2p<sup>3</sup>; F 2s<sup>2</sup> 2p<sup>5</sup>; Bi, 6s<sup>2</sup> 6p<sup>3</sup>; I 5s<sup>2</sup> 5p<sup>5</sup>. a Monkhorst - Pack k-point sampling of 2×1×1 and an energy cutoff adopted 517 eV.

## 1.10 Fabrication of planar (1,5-PDA) BiI<sub>5</sub> single-crystal detectors

The planar SC X-ray detector was fabricated by vacuum evaporation deposition of parallel Au electrodes (120 nm thickness) on the SC surface. Each device has an area of 0.15 mm<sup>2</sup>.

### 1.11 Characterization of dielectric constant of (1,5-PDA)BiI<sub>5</sub> SCs

We used Au/(1,5-PDA)BiI<sub>5</sub>/Au as the dielectric device, and the dielectric constant ( $\epsilon = 27.8$ ) was directly measured by Tonghui TH2828A analyzer. (1,5-PDA)BiI<sub>5</sub> is used as the dielectric layer, and its electrode area is 18.62 mm<sup>2</sup> and the crystal thickness is 1.45 mm.

### 1.12 Photoconductivity measurements

We use vertical structure to conduct photoconductivity measurements, wherein Au with a thickness of 120 nm was evaporated on both sides of the SC to form an Au/(1,5-PDA)BiI<sub>5</sub>/Au structure with a device area of 18.42 mm<sup>2</sup> and a crystal thickness of 1.45 mm. A modified Hecht equation was used to fit the obtained result, deriving the information of  $\mu\tau$  product and surface recombination velocity  $s$ .

$$I = \frac{I_0 \mu \tau V \left( 1 - \exp\left(-\frac{L^2}{\mu \tau V}\right) \right)}{L^2 \left( 1 + \frac{Ls}{V\mu} \right)}$$

where  $I_0$  is the saturated photocurrent,  $L$  is the thickness,  $V$  is the applied bias,  $\tau$  is the carrier lifetime. The fitting curve was shown in Figure 4c.

### 1.13 X-ray detector performance measurements

X-ray detection performance was measured on the measurement system in the DX-2700B X-ray diffractometer. All X-ray response characterizations were performed directly in a dark air environment to minimize electromagnetic and ambient light interference. A DS2901/24 X-ray tube with a tungsten target and 2.4kW output power was used as the source. Different radiation dose rates can be obtained by adjusting the values of accelerating voltage and working current. Aluminum sheets of different thicknesses were inserted between the X-ray source and the (1,5-PDA)BiI<sub>5</sub> detector as attenuators. The X-ray radiation dose rate was also calibrated using an Accu-Gold digitizer.

### 1.14 Characterization of (1,5-PDA)BiI<sub>5</sub> SCs mobility

When operating in Child's regime, I-V curve follows the Mott-Gurney law:

$$J_D = \frac{9}{8} \varepsilon \varepsilon_0 \mu \frac{V^2}{L^3}$$

Where  $\mu$  is the carrier mobility and  $V$  is the bias voltage,  $\varepsilon_0$  is the vacuum permittivity,  $\varepsilon$  is the relative dielectric constant,  $L$  is the thickness of SCs. Thereby, we could estimate the carrier mobility in this region.

## 2. Supporting Figures

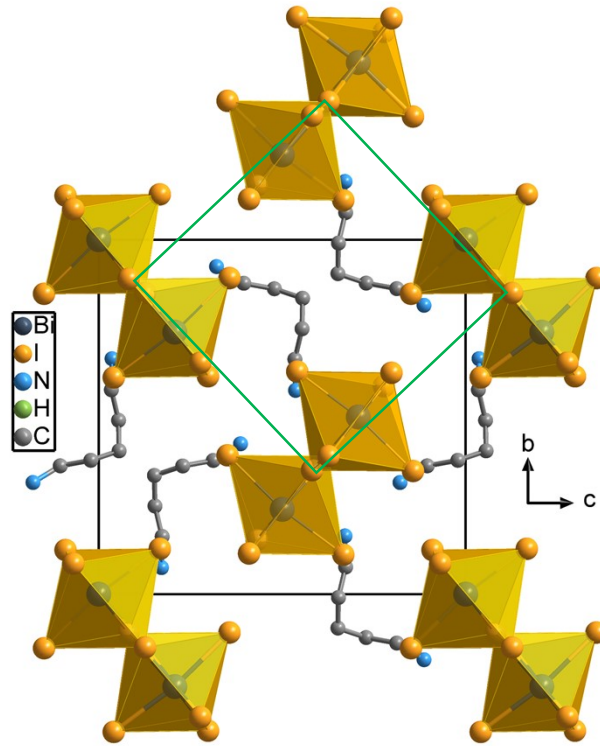

**Fig. S1.** The packing structure of (1,5-PDA)BiI<sub>5</sub> viewing along the  $a$ -axis direction. The green box represents cavities that can be seen as composed of the four (BiI<sub>5</sub>)<sub>n</sub><sup>2n-</sup> zigzag chains.

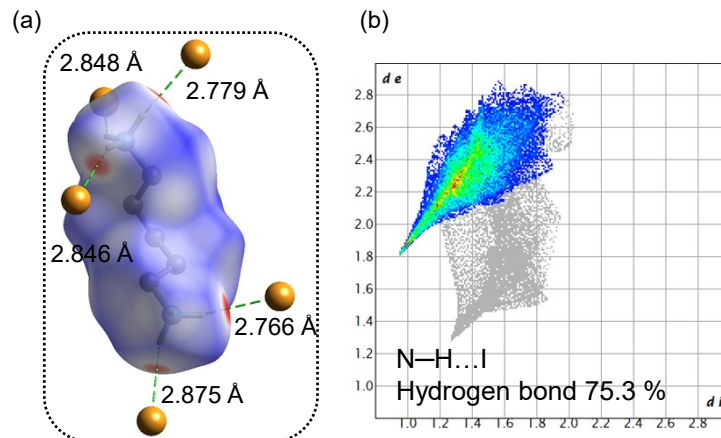

**Fig. S2** (a) Hirshfeld surface mapped with  $d_{\text{norm}}$  and distribution of hydrogen bonds for 1,5-PDA

cation. (b) Fingerprint plots for 1,5-PDA cation resolved into N-H...I hydrogen bond.

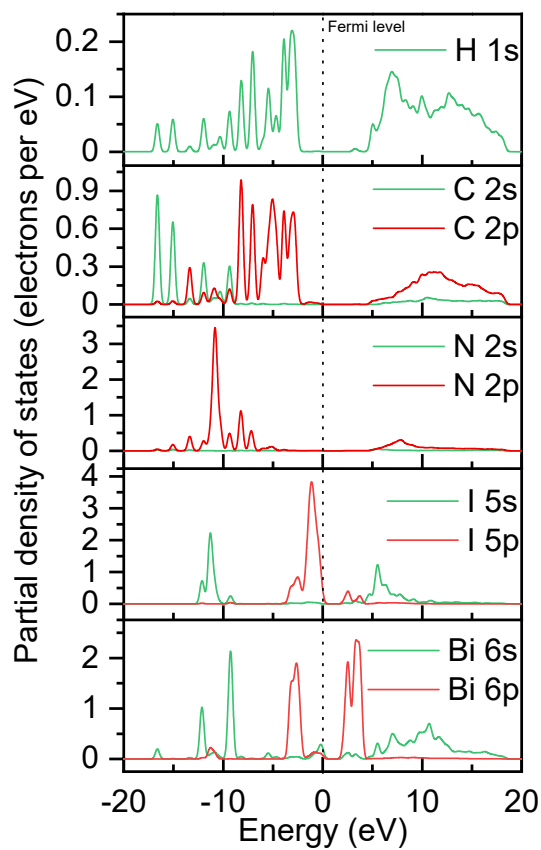

**Fig. S3** PDOS of (1,5-PDA)BiI<sub>5</sub>.

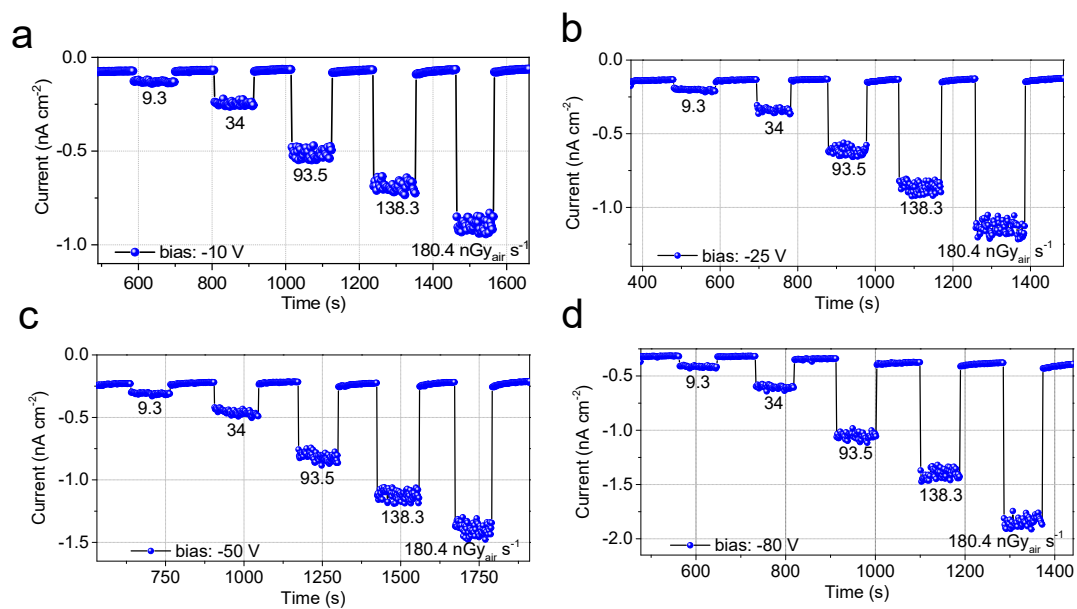

**Fig. S4** Photoelectric response curve of the (1,5-PDA)BiI<sub>5</sub> detector under different doses and bias voltage: (a) -10 V, (b) -25 V, (c) -50 V, and (d) -80 V.

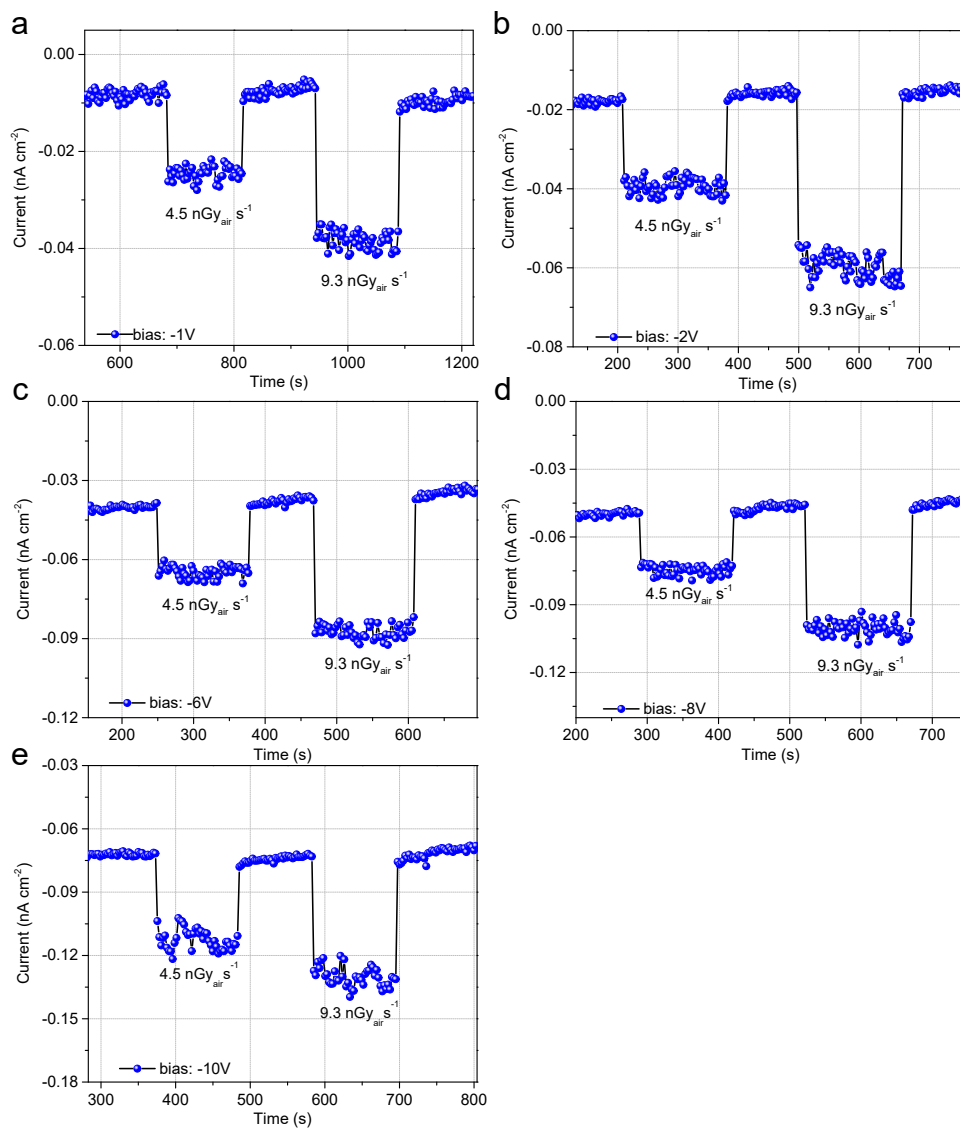

**Fig. S5** Weak light response of the (1,5-PDA)BiI<sub>5</sub> detector under different bias voltages: (a) - 1 V, (b) -2 V, (c) -6 V, (d) -8 V, and (e) -10 V.



### 3. Supporting Tables

**Table S1.** Crystal data for (1,5-PDA)BiI<sub>5</sub> at 302.15 K.

| Compound                     | (1,5-PDA)BiI <sub>5</sub>                                      |
|------------------------------|----------------------------------------------------------------|
| Formula                      | C <sub>5</sub> H <sub>16</sub> BiI <sub>5</sub> N <sub>2</sub> |
| $D_{calc.}/\text{g cm}^{-3}$ | 3.519                                                          |
| $m/\text{mm}^{-1}$           | 18.464                                                         |
| Formula Weight               | 947.68                                                         |
| Colour                       | dull dark black                                                |
| Shape                        | rhombohedral-shaped                                            |
| Size/ $\text{mm}^3$          | 0.35×0.22×0.21                                                 |
| $T/\text{K}$                 | 302.15(10)                                                     |
| Crystal System               | orthorhombic                                                   |
| Flack Parameter              | -0.020(4)                                                      |
| Hooft Parameter              | -0.011(4)                                                      |
| Space Group                  | $P2_12_12_1$                                                   |
| $a/\text{Å}$                 | 8.5824(4)                                                      |
| $b/\text{Å}$                 | 14.7005(7)                                                     |
| $c/\text{Å}$                 | 14.1760(7)                                                     |
| $a^\circ$                    | 90                                                             |
| $b^\circ$                    | 90                                                             |
| $g^\circ$                    | 90                                                             |
| $V/\text{Å}^3$               | 1788.52(15)                                                    |
| $Z$                          | 4                                                              |
| $Z'$                         | 1                                                              |
| Wavelength/Å                 | 0.71073                                                        |
| Radiation type               | Mo K $_{\alpha}$                                               |
| $Q_{min}^\circ$              | 2.748                                                          |
| $Q_{max}^\circ$              | 30.884                                                         |
| Measured Refl's.             | 15677                                                          |
| Indep't Refl's               | 4599                                                           |
| Refl's $I \geq 2\sigma(I)$   | 3989                                                           |
| $R_{int}$                    | 0.0529                                                         |
| Parameters                   | 120                                                            |
| Restraints                   | 0                                                              |
| Largest Peak                 | 1.499                                                          |
| Deepest Hole                 | -2.589                                                         |
| GooF                         | 1.051                                                          |
| $wR_2$ (all data)            | 0.0954                                                         |
| $wR_2$                       | 0.0909                                                         |
| $R_1$ (all data)             | 0.0509                                                         |
| $R_1$                        | 0.0411                                                         |

**Table S2.** Bond Lengths in Å for (1,5-PDA)BiI<sub>5</sub>.

| Atom | Atom            | Length/Å   |
|------|-----------------|------------|
| Bi1  | I1              | 3.2290(10) |
| Bi1  | I1 <sup>1</sup> | 3.3144(10) |
| Bi1  | I2              | 3.0817(12) |
| Bi1  | I3              | 2.9792(10) |
| Bi1  | I4              | 3.0460(11) |
| Bi1  | I5              | 2.8928(11) |

<sup>1</sup>1/2+x,1/2-y,1-z**Table S3.** Bond Angles in ° for (1,5-PDA)BiI<sub>5</sub>.

| Atom | Atom | Atom            | Angle/°    |
|------|------|-----------------|------------|
| I1   | Bi1  | I1 <sup>1</sup> | 83.990(13) |
| I2   | Bi1  | I1 <sup>1</sup> | 85.72(3)   |
| I2   | Bi1  | I1              | 87.44(3)   |
| I3   | Bi1  | I1 <sup>1</sup> | 90.81(3)   |
| I3   | Bi1  | I2              | 90.50(3)   |
| I3   | Bi1  | I4              | 91.70(3)   |
| I4   | Bi1  | I1 <sup>1</sup> | 86.07(3)   |
| I4   | Bi1  | I1              | 89.64(3)   |
| I5   | Bi1  | I1              | 87.39(3)   |
| I5   | Bi1  | I2              | 97.36(4)   |
| I5   | Bi1  | I3              | 97.90(3)   |
| I5   | Bi1  | I4              | 90.44(3)   |

<sup>1</sup>1/2+x,1/2-y,1-z; <sup>2</sup>-1/2+x,1/2-y,1-z**Table S4.** Summary of growth methods, trap density and carrier mobility of Bi-based materials.

| Material                                                                         | Growth method                                                     | Hole trap density (cm <sup>-3</sup> ) | Carrier mobility (cm <sup>2</sup> V <sup>-1</sup> s <sup>-1</sup> ) |
|----------------------------------------------------------------------------------|-------------------------------------------------------------------|---------------------------------------|---------------------------------------------------------------------|
| MA <sub>3</sub> Bi <sub>2</sub> I <sub>9</sub> SC <sup>[1]</sup>                 | inverse temperature crystallization (ITC)                         | 1.3 × 10 <sup>10</sup>                | -                                                                   |
| (NH <sub>4</sub> ) <sub>3</sub> Bi <sub>2</sub> I <sub>9</sub> SC <sup>[2]</sup> | slow solvent evaporation method                                   | 4.84 × 10 <sup>9</sup>                | 11                                                                  |
| (H <sub>2</sub> MDAP)BiI <sub>5</sub> SC <sup>[3]</sup>                          | top-seeded solution growth method                                 | 3.6 × 10 <sup>11</sup>                | 1.42                                                                |
| (3-AMP)BiI <sub>5</sub> SC <sup>[4]</sup>                                        | temperature cooling technique                                     | 3.53 × 10 <sup>9</sup>                | 4.85 × 10 <sup>-2</sup>                                             |
| (BZA) <sub>3</sub> BiI <sub>6</sub> SC <sup>[4]</sup>                            | temperature cooling technique                                     | 4.25 × 10 <sup>11</sup>               | 6.16 × 10 <sup>-3</sup>                                             |
| FA <sub>3</sub> Bi <sub>2</sub> I <sub>9</sub> SC <sup>[5]</sup>                 | secondary solution constant-temperature evaporation (SSCE) method | 9.48 × 10 <sup>9</sup>                | 4                                                                   |
| Cs <sub>3</sub> Bi <sub>2</sub> Br <sub>9</sub> SC <sup>[6]</sup>                | solid slow cooling method                                         | 9.7 × 10 <sup>10</sup>                | 0.17                                                                |
| Cs <sub>3</sub> Bi <sub>2</sub> I <sub>9</sub> SC <sup>[7]</sup>                 | solution evaporation method                                       | 8.65 × 10 <sup>10</sup>               | -                                                                   |
| (1,5-PDA)BiI <sub>5</sub> SC (this work)                                         | <b>liquid phase diffusion method</b>                              | <b>1.31x10<sup>9</sup></b>            | <b>28.207</b>                                                       |

**References:**

1. Tailor, N. K. *et al.* Influence of the A-site cation on hysteresis and ion migration in lead-free perovskite single crystals. *Phys. Rev. Mater.* **6**, 045401 (2022).
2. Zhuang, R. *et al.* Highly sensitive X-ray detector made of layered perovskite-like (NH<sub>4</sub>)<sub>3</sub>Bi<sub>2</sub>I<sub>9</sub> single crystal with anisotropic response. *Nat. Photonics* **13**, 602–608 (2019).
3. Tao, K. *et al.* A Lead-Free Hybrid Iodide with Quantitative Response to X-ray Radiation. *Chem. Mater.* **31**, 5927–5932 (2019).
4. Yang, X., Huang, Y.-H., Wang, X.-D., Li, W.-G. & Kuang, D.-B. A-Site Diamine Cation

- Anchoring Enables Efficient Charge Transfer and Suppressed Ion Migration in Bi-Based Hybrid Perovskite Single Crystals. *Angew. Chem. Int. Ed.* **61**, e202204663 (2022).
5. Li, W. *et al.* Zero-Dimensional Lead-Free  $\text{FA}_3\text{Bi}_2\text{I}_9$  Single Crystals for High-Performance X-ray Detection. *J. Phys. Chem. Lett.* **12**, 1778–1785 (2021).
  6. Li, X. *et al.* Lead-free halide perovskite  $\text{Cs}_3\text{Bi}_2\text{Br}_9$  single crystals for high-performance X-ray detection. *Sci. China Mater.* **64**, 1427–1436 (2021).
  7. Li, L. *et al.* Centimeter-Sized Stable Zero-Dimensional  $\text{Cs}_3\text{Bi}_2\text{I}_9$  Single Crystal for Mid-Infrared Lead-Free Perovskite Photodetector. *J. Phys. Chem. C* **126**, 3646–3652 (2022).
